# Supplementary material for: Parasitism-Induced Changes in Microbial Eukaryotes of Peruvian Alpaca Gastrointestinal Tract
Source: MDPI journal article supplement (doi:10.3390/life14020187), 2024-01-27
Supplement: s1 [file s1]

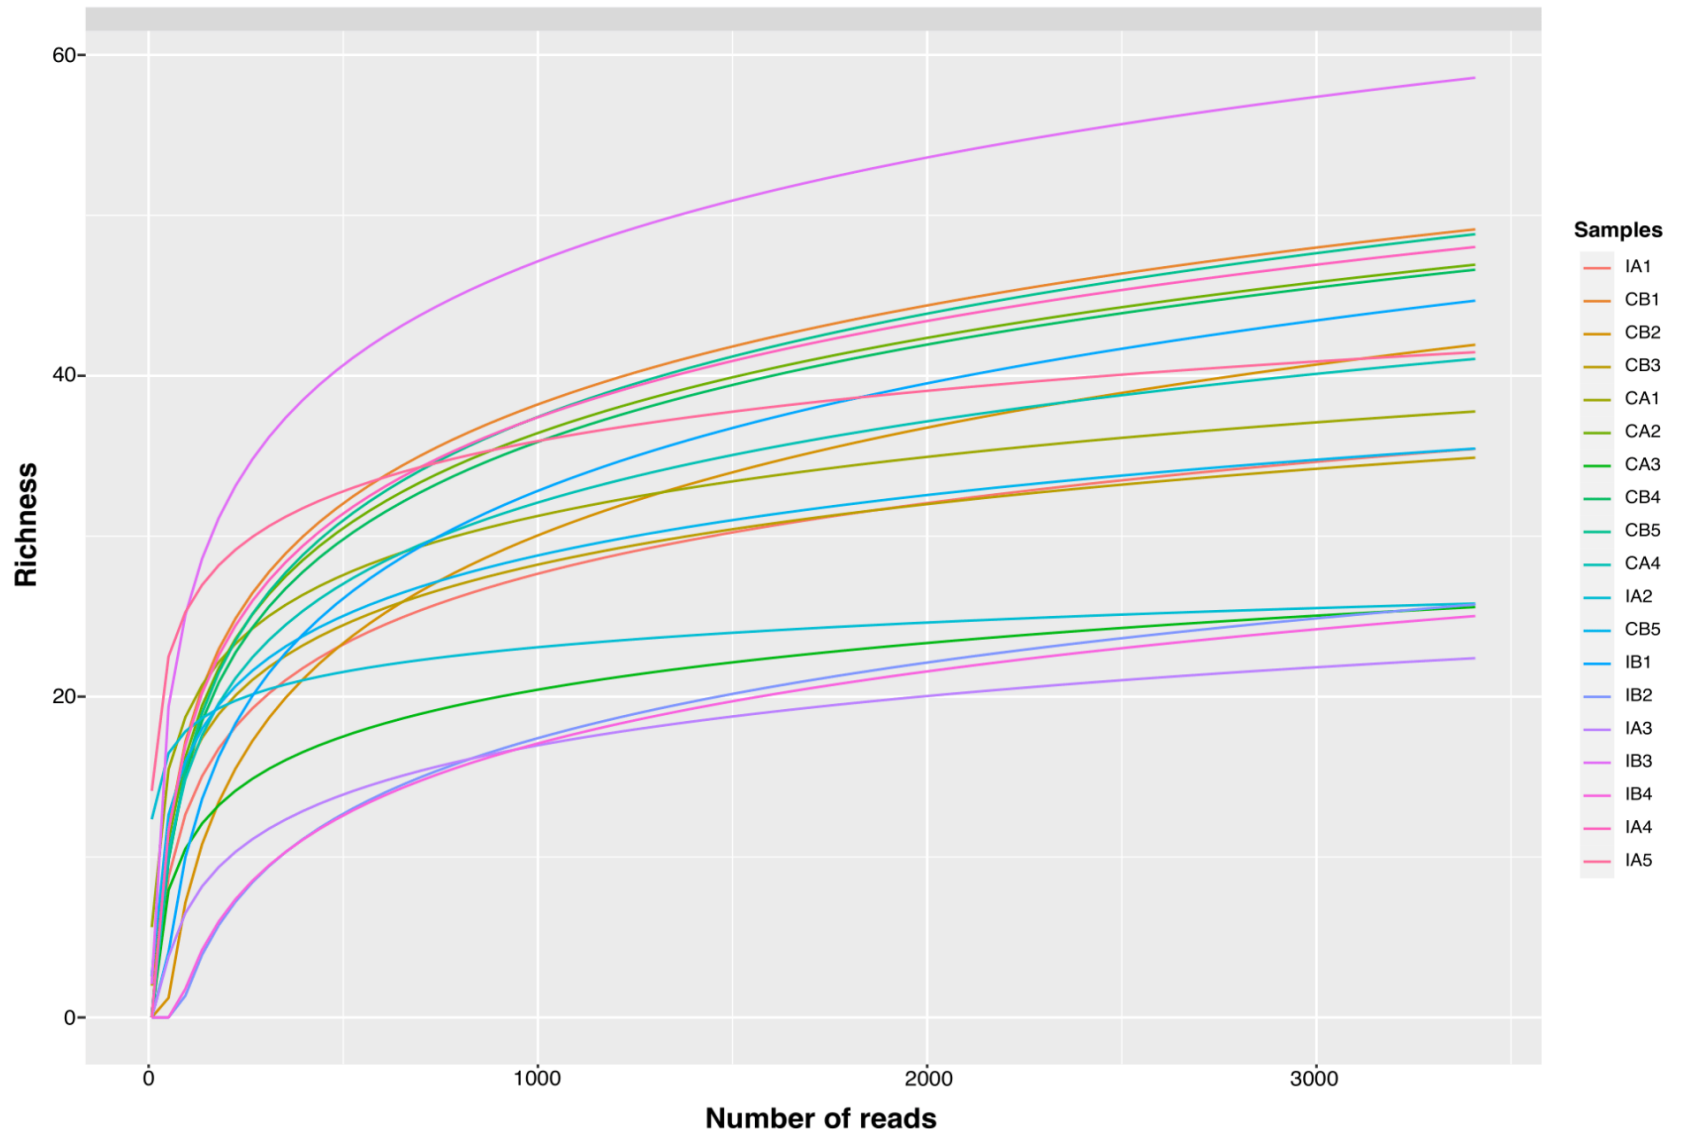

**Figure S1.** Species richness rarefaction curves show sequencing depth of 18S data obtained from fungi from gut samples.

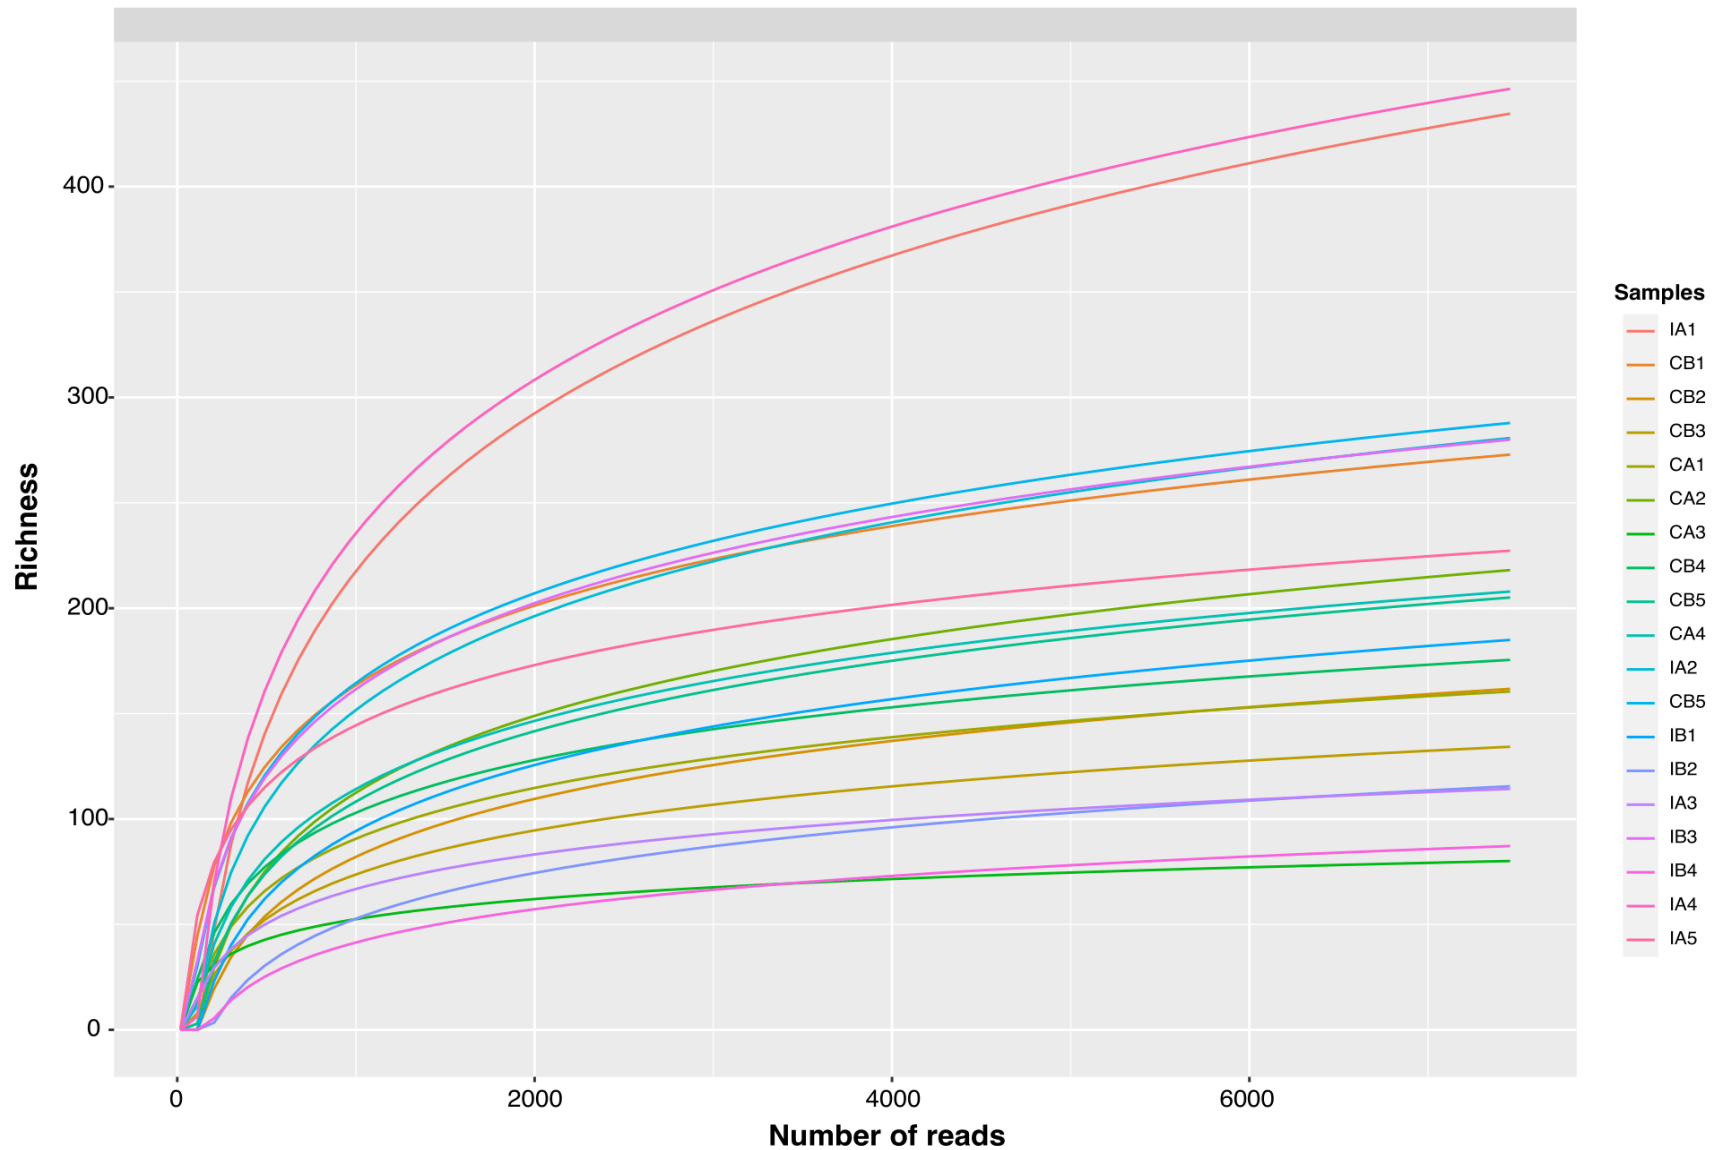

**Figure S2.** Species richness rarefaction curves show sequencing depth of 18S data obtained from protist from gut samples.

**Table S1.** Ooquistes per gram of feces (OPG) in 2-month-old alpacas with and without diarrhea infected with *Eimeria lamae*.

| Age      | Health Condition | ID  | Parasite        | Ooquistes per gram of feces (OPG) |
|----------|------------------|-----|-----------------|-----------------------------------|
| 2 months | with diarrhea    | IB1 | <i>E. lamae</i> | 15750                             |
|          |                  | IB2 | <i>E. lamae</i> | 22450                             |
|          |                  | IB3 | <i>E. lamae</i> | 34800                             |
|          |                  | IB4 | <i>E. lamae</i> | 12750                             |
|          | without diarrhea | CB1 | <i>E. lamae</i> | 0                                 |
|          |                  | CB2 | <i>E. lamae</i> | 0                                 |
|          |                  | CB3 | <i>E. lamae</i> | 0                                 |
|          |                  | CB4 | <i>E. lamae</i> | 0                                 |
|          |                  | CB5 | <i>E. lamae</i> | 0                                 |
|          |                  | CB6 | <i>E. lamae</i> | 0                                 |

**Table S2.** Biochemical parameters of alpacas in relation to their health status. H: Hemoglobin; L: Leukocyte; HR: Heart Rate; BF: Respiratory Rate.

| Samples | Health Condition              | H (g/dL) | L (mm <sup>3</sup> ) | HR (bpm) | BF (bpm) |
|---------|-------------------------------|----------|----------------------|----------|----------|
| IA1     | <i>Giardia sp.</i> positive   | 34.69    | 7950                 | 172      | 42       |
| IA2     | <i>Giardia sp.</i> positive   | 36.36    | 9150                 | 96       | 34       |
| IA3     | <i>Giardia sp.</i> positive   | 38.46    | 9425                 | 138      | 48       |
| IA4     | <i>Giardia sp.</i> positive   | 38.46    | 6000                 | 116      | 28       |
| IA5     | <i>Giardia sp.</i> positive   | 37.25    | 11850                | 96       | 38       |
| IB1     | <i>Eimeria lamae</i> positive | 31.63    | 11500                | 110      | 28       |
| IB2     | <i>Eimeria lamae</i> positive | 34       | 8000                 | 126      | 36       |
| IB3     | <i>Eimeria lamae</i> positive | 32.71    | 9200                 | 134      | 34       |
| IB4     | <i>Eimeria lamae</i> positive | 38.46    | 22100                | 116      | 34       |
| CA1     | <i>Giardia sp.</i> negative   | 30       | 6350                 | 152      | 48       |
| CA2     | <i>Giardia sp.</i> negative   | 31.58    | 8750                 | 128      | 34       |
| CA3     | <i>Giardia sp.</i> negative   | 30       | 8500                 | 132      | 28       |
| CA4     | <i>Giardia sp.</i> negative   | 34.29    | 7850                 | 100      | 26       |
| CB1     | <i>Eimeria lamae</i> negative | 34.69    | 7950                 | 172      | 42       |
| CB2     | <i>Eimeria lamae</i> negative | 33.33    | 18400                | 148      | 26       |
| CB3     | <i>Eimeria lamae</i> negative | 35       | 1750                 | 148      | 40       |
| CB4     | <i>Eimeria lamae</i> negative | 35.85    | 12800                | 130      | 15       |
| CB5     | <i>Eimeria lamae</i> negative | 31       | 1550                 | 142      | 26       |
| CB6     | <i>Eimeria lamae</i> negative | 39.22    | 9550                 | 188      | 44       |
